# Supplementary material for: Methyl Jasmonate Induces Genes Involved in Linalool Accumulation and Increases the Content of Phenolics in Two Iranian Coriander (Coriandrum sativum L.) Ecotypes
Source: MDPI journal article supplement (doi:10.3390/genes13101717), 2022-09-24
Supplement: s1 [file s1]

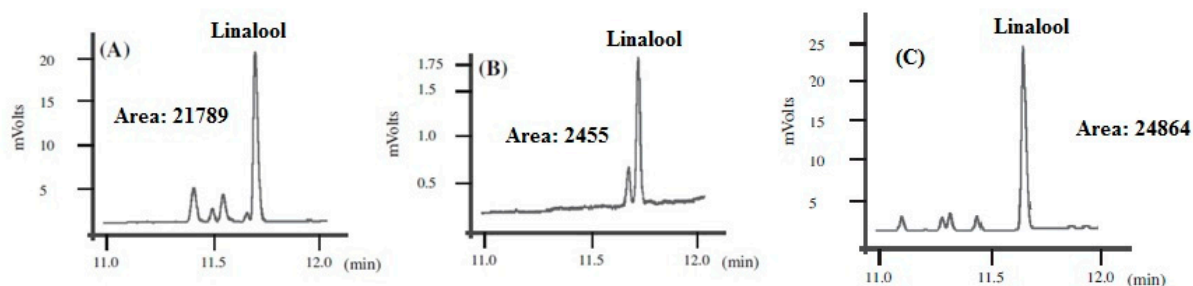

**Figure S1.** Gas chromatogram for (A) linalool standard (ranging from 12,285 to 220,604  $\mu\text{g/L}$ ) (B) CsLIN product in control and (C) CsLIN product in 150  $\mu\text{M}$  MeJA treated-plants.

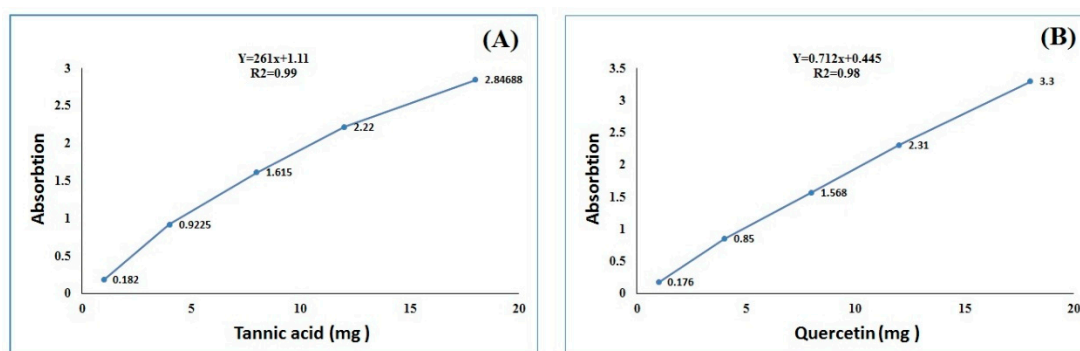

**Figure S2.** Standard curve of total phenolic content (A) and total flavonoid content (B).

**Table S1-** Essential oil (EO) terpene composition of control plant. Error bar are in percent standard deviation.

| Composition           | % of total       |
|-----------------------|------------------|
| (S)-linalool          | 55.44 $\pm$ 1.97 |
| Cymene                | 13.52 $\pm$ 1.65 |
| Ocimene               | 9.27 $\pm$ 2.44  |
| Camphor               | 7.38 $\pm$ 1.29  |
| $\gamma$ -Terpinene   | 5.22 $\pm$ 1.55  |
| Limonene              | 3.88 $\pm$ 0.1   |
| Linalool oxide        | 3.14 $\pm$ 0.18  |
| Geraniol              | 0.65 $\pm$ 0.24  |
| $\beta$ -Phellandrene | 0.52 $\pm$ 0.12  |
| Sabinene              | 0.45 $\pm$ 0.16  |
| Camphene              | 0.35 $\pm$ 0.12  |
| Terpinen-4-ol         | 0.21 $\pm$ 0.1   |
| Borneol               | 0.21 $\pm$ 0.05  |
| $\alpha$ -Terpineol   | 0.20 $\pm$ 0.08  |
| Terpinolene           | 0.11 $\pm$ 0.02  |
